# Supplementary material
Source: MDPI journal article supplement (https://www.mdpi.com/2225-1154/5/4/79)

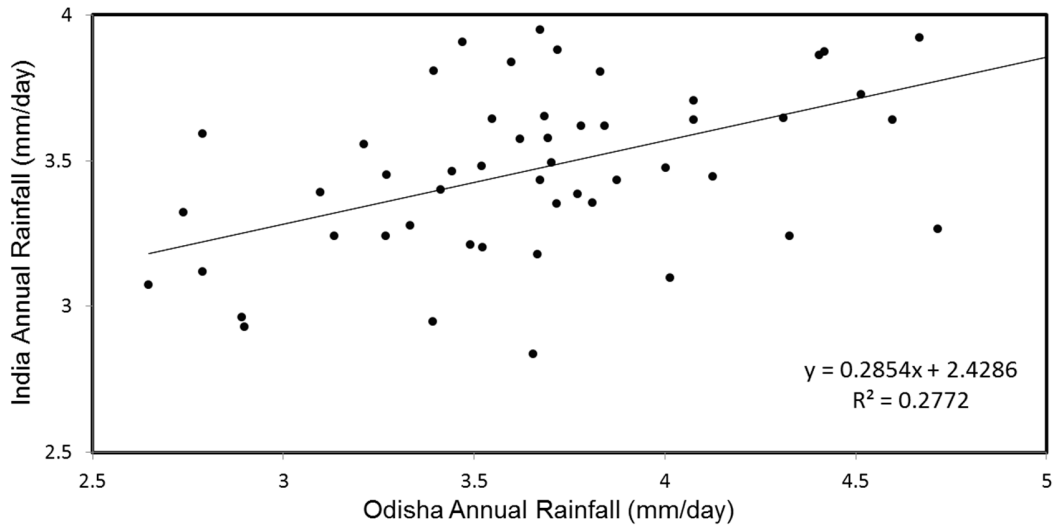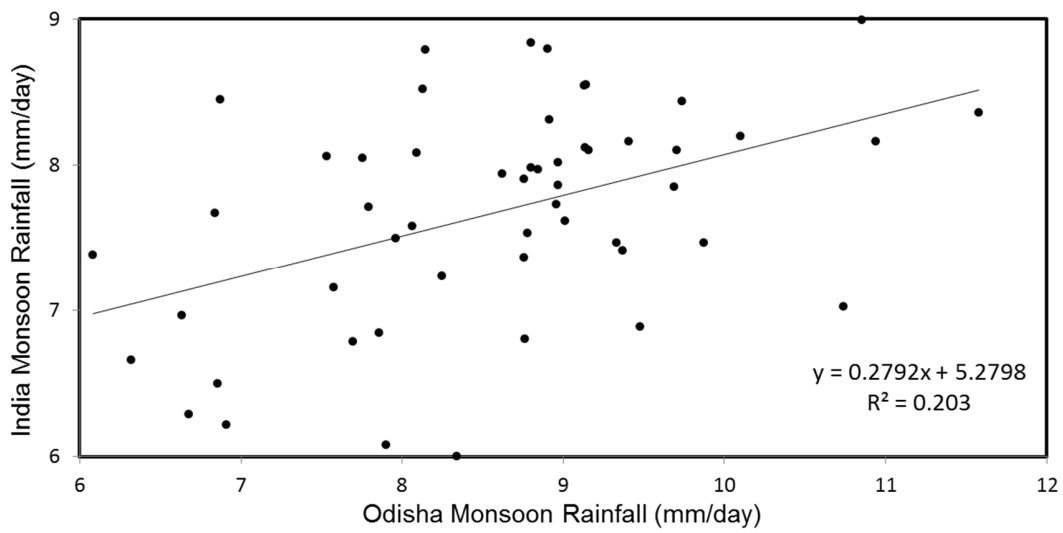

**Figure S1:** Relationship of (a) annual and (b) monsoon rainfall over India and Odisha

Supplement: s1 [file s1]
